# Supplementary material for: Liver-Derived Cell Transfection Model Efficacy for HBV Genotype B Replication/Transcription Is Determined by Complex Host Transcription Factor Network
Source: PubMed Central journal article supplement (PMC8005026; doi:10.3390/v13030524), 2021-03-22

(A)

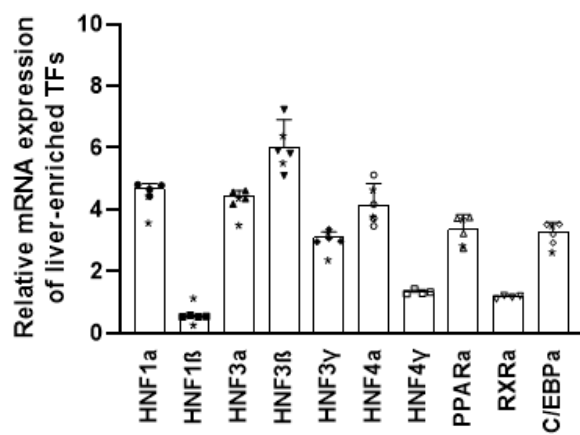

(B)

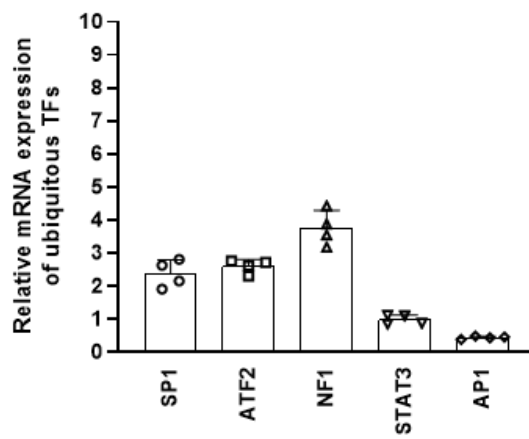

Supplement: viruses-13-00524-s001.pdf [file viruses-13-00524-s001.pdf]
